# Supplementary material for: Targeting of BMI-1 with PTC-209 shows potent anti-myeloma activity and impairs the tumour microenvironment
Source: PubMed Central journal article supplement (PMC4776359; doi:10.1186/s13045-016-0247-4), 2016-03-02
Supplement: 13045_2016_247_MOESM1_ESM.pdf [file 13045_2016_247_MOESM1_ESM.pdf]

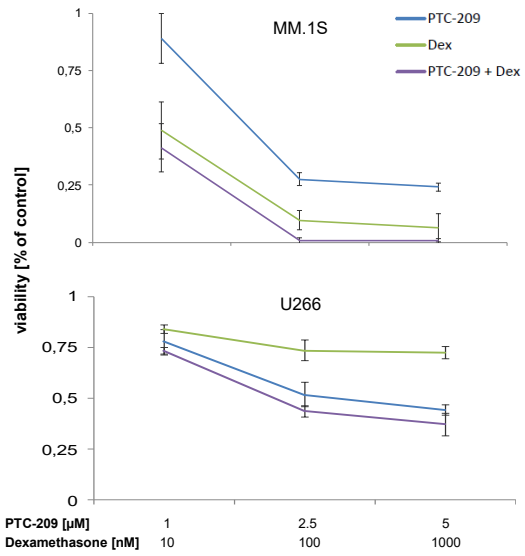

|                  | PTC-209 [μM] | Dexamethasone [nM] | Combination Index |
|------------------|--------------|--------------------|-------------------|
| <b>KMS-12-BM</b> | 1            | 10                 | 1.3               |
|                  | 2.5          | 100                | 0.50              |
|                  | 5            | 1000               | 3.45              |
| <b>OPM-2</b>     | 1            | 10                 | 0.24              |
|                  | 2.5          | 100                | 0.11              |
|                  | 5            | 1000               | 0.12              |
| <b>MM.1S</b>     | 1            | 10                 | 1.27              |
|                  | 2.5          | 100                | 0.10              |
|                  | 5            | 1000               | 0.19              |
| <b>NCI-H929</b>  | 1            | 10                 | 0.90              |
|                  | 2.5          | 100                | 0.24              |
|                  | 5            | 1000               | 0.59              |
| <b>SK-MM-1</b>   | 1            | 10                 | NA                |
|                  | 2.5          | 100                | NA                |
|                  | 5            | 1000               | NA                |
| <b>U266</b>      | 1            | 10                 | 0.86              |
|                  | 2.5          | 100                | 0.57              |
|                  | 5            | 1000               | 0.84              |
